# Supplementary material for: Effects of Pinus massoniana pollen polysaccharides on intestinal microenvironment and colitis in mice
Source: Royal Society of Chemistry journal article supplement (doi:10.1039/d0fo02190c), 2020-12-08
Supplement: d0fo02190c1.pdf [file d0fo02190c1.pdf]

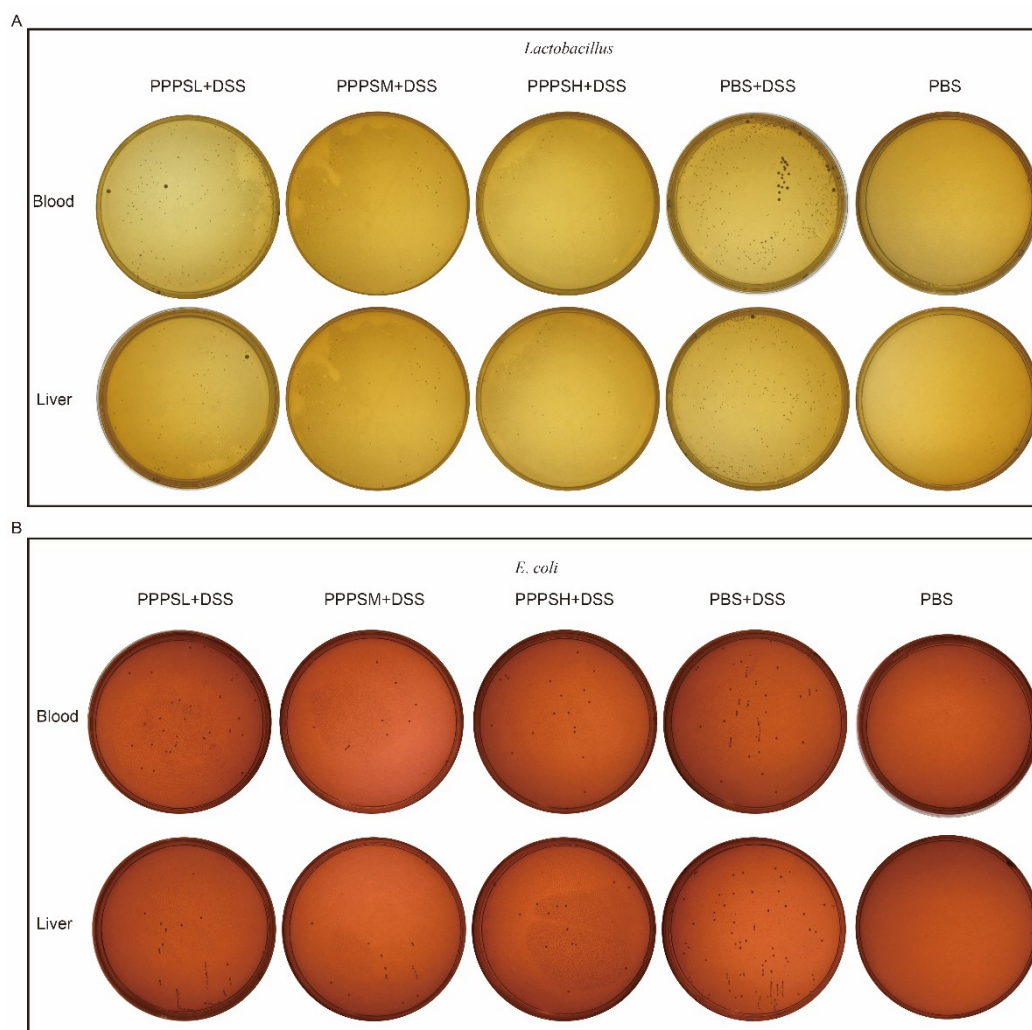

**Figure S1. PPPS can reduce the bacterial translocation in colitis.** (A) The MRS plates were used to analysis *Lactobacillus* and the numbers of bacteria colonies in the blood and liver. (B) The EMB plates was used to analysis *E. coli* the numbers of bacteria colonies in the blood and liver. Each symbol represents an individual mouse (n = 5 mice) The data (A-B) are representative of three independent experiments. PPPSL, PPPS low dosage (50m /mL); PPPSM, PPPS moderate dosage (125mg /mL); PPPSH, PPPS high dosage (250mg /mL).
